# Supplementary material for: Physiological and Metabolomic Analyses of Exogenously Applied Sorbitol-Chelated Potassium Enhancing Drought Tolerance in Wheat
Source: Research Square preprint supplement (doi:10.21203/rs.3.rs-7498264/v1), 2025-09-12
Supplement: Supplementary file 1 [file 155f9b51512de57ef75ec85a.xlsx]

## Sheet: Supplementary materials 1
pos_
Group	Total_num	Diff_num	Up_num	Down_num
SK_vs_CK2	1243	29	3	26
K_vs_CK2	1243	39	28	11
MK_vs_CK2	1243	244	23	221
S_vs_CK2	1243	43	21	22
neg_
Group	Total_num	Diff_num	Up_num	Down_num
SK_vs_CK2	545	22	8	14
K_vs_CK2	545	8	2	6
MK_vs_CK2	545	15	5	10
S_vs_CK2	545	18	6	12

## Sheet: Supplementary materials 2
Level1	Level2	Level3	Meta_Num	Metabolite_ID	Metabolite_name	KEGG_CIDs
Environmental Information Processing	Membrane transport	ko02010 ABC transporters	33	pos_1066;pos_1124;pos_1263;pos_140;pos_1421;pos_1494;pos_156;pos_163;pos_2048;pos_604;pos_73;pos_7428;pos_7630;pos_831;pos_84;pos_88;pos_8992;pos_912;pos_938;pos_9613;neg_1027;neg_1065;neg_1202;neg_329;neg_372;neg_41;neg_425;neg_502;neg_539;neg_730;neg_788;neg_835;neg_899	L-Glutamate;N-Acetyl-D-glucosamine;Sucrose;L-Isoleucine;Deoxyinosine;Deoxycytidine;L-Valine;L-Arginine;Sparfloxacin;Moxifloxacin;Choline;Oleandomycin;Riboflavin;Thiosulfate;Betaine;L-Proline;L-Leucine;L-Phenylalanine;Xylitol;Mannopine;L-Lysine;Carnitine;Nopaline;alpha-1,5-L-Arabinotetraose;Chitobiose;Sulfate;Maltotriose;Uridine;Raffinose;Ciprofloxacin;Isomaltotriose;Glutathione;alpha-1,5-L-Arabin…	C00025;C00140;C00089;C00407;C05512;C00881;C00183;C00062;C07662;C07663;C00114;C01946;C00255;C00320;C00719;C00148;C00123;C00079;C00379;C16692;C00047;C00487;C01682;C20572;C01674;C00059;C01835;C00299;C00492;C05349;C02160;C00051;C20571
Environmental Information Processing	Signal transduction	ko04075 Plant hormone signal transduction	6	pos_1076;pos_1429;pos_291;pos_895;pos_9661;neg_1124	(-)-Jasmonoyl-L-isoleucine;(-)-Jasmonic acid;Brassinolide;(+)-Abscisic acid;Gibberellin A4;Abscisate	C18699;C08491;C08814;C06082;C11864;C06082
Genetic Information Processing	Translation	ko00970 Aminoacyl-tRNA biosynthesis	11	pos_1066;pos_140;pos_156;pos_163;pos_164;pos_88;pos_8992;pos_912;neg_1027;neg_254;neg_44	L-Glutamate;L-Isoleucine;L-Valine;L-Arginine;L-Tyrosine;L-Proline;L-Leucine;L-Phenylalanine；L-Lysine;L-Tryptophan;L-Asparagine	C00025;C00407;C00183;C00062;C00082;C00148;C00123;C00079;C00047;C00078;C00152
Genetic Information Processing	Folding, sorting and degradation	ko04122 Sulfur relay system	1	neg_910	S-Adenosyl-L-methionine	C00019
Metabolism	Amino acid metabolism	ko00220 Arginine biosynthesis	4	pos_1066;pos_163;pos_923；neg_573	L-Glutamate;L-Arginine;N-Acetyl-L-glutamate;	C00025;C00062;C00624;C00327
Metabolism	Amino acid metabolism	ko00250 Alanine, aspartate and glutamate metabolism	4	pos_1066;neg_44;neg_67;neg_77	L-Citrulline	C00025;C00152;C00158;C00158
Metabolism	Amino acid metabolism	ko00260 Glycine, serine and threonine metabolism	5	pos_73;pos_84;pos_92;neg_254;neg_326	L-Glutamate;	C00114;C00719;C00143;C00078;C01102
Metabolism	Amino acid metabolism	ko00270 Cysteine and methionine metabolism	9	pos_1134;pos_3057;pos_961;neg_222;neg_366;neg_41;neg_449;neg_835;neg_910	L-Asparagine;Citrate;Citric acid	C05526;C03539;C00170;C00170;C03145;C00059;C01137;C00051;C00019
Metabolism	Amino acid metabolism	ko00280 Valine, leucine and isoleucine degradation	5	pos_140;pos_156;pos_6384;pos_8992;pos_939	Choline;Betaine;5,10-Methylenetetrahydrofolate;	C00407;C00183;C15976;C00123;C20827C02504
Metabolism	Amino acid metabolism	ko00290 Valine, leucine and isoleucine biosynthesis	4	pos_140;pos_156;pos_8992;neg_252	L-Isoleucine;L-Valine;L-Leucine;alpha-Isopropylmalate	C00407;C00183;C00123;C02504
Metabolism	Amino acid metabolism	ko00300 Lysine biosynthesis	5	pos_1455;pos_9043;pos_918;neg_1027;neg_613	(2R,3R)-3-Methylornithinyl-N6-lysine;UDP-N-acetylmuramoyl-L-alanyl-D-glutamyl-6-carboxy-L-lysyl-D-alanyl-D-alanine;(2R,3R)-3-Methylornithine;L-Lysine;N-Succinyl-2-L-amino-6-oxoheptanedioate	C20278;C04882;C20277;C00047;C04462
Metabolism	Amino acid metabolism	ko00310 Lysine degradation	8	pos_107;pos_1256;pos_36;pos_74;neg_1027;neg_1065;neg_1264;neg_639	5-Aminopentanal;5-Phosphooxy-L-lysine;(S)-5-Amino-3-oxohexanoic acid;5-Aminopentanoate;L-Lysine;Carnitine;D-Lysopine;5-Oxopentanoate	C12455;C03366;C03656;C00431;C00047;C00487;C04020;C03273
Metabolism	Amino acid metabolism	ko00330 Arginine and proline metabolism	15	pos_1066;pos_1319;pos_1458;pos_163;pos_74;pos_88;pos_94;pos_9443;neg_1075;neg_1202;neg_449;neg_465;neg_480;neg_575;neg_910	L-Glutamate;4-Guanidinobutanoate;N4-Acetylaminobutanal;L-Arginine;5-Aminopentanoate;L-Proline;4-Aminobutyraldehyde;Carboxyspermidine;Feruloylputrescine;Nopaline;S-Adenosylmethioninamine;L-Arginine phosphate;N-Methylhydantoin;5-Guanidino-2-oxopentanoate;S-Adenosyl-L-methionine	C00025;C01035;C05936;C00062;C00431;C00148;C00555;C18172;C10497;C01682;C01137;C05945;C02565;C03771;C00019
Metabolism	Amino acid metabolism	ko00340 Histidine metabolism	9	pos_1066;pos_1406;pos_1407;pos_1681;pos_64;pos_976;neg_695;neg_721;neg_935	L-Glutamate;S-(Hercyn-2-yl)-L-cysteine S-oxide;L-Histidinol phosphate;4-Imidazolone-5-propanoate;Thiourocanic acid;N-Formimino-L-glutamate;gamma-L-Glutamyl-S-(hercyn-2-yl)-L-cysteine S-oxide;Hercynine;1-Methylhistamine	C00025;C20994;C01100;C03680;C05571;C00439;C20995;C05575;C05127
Metabolism	Amino acid metabolism	ko00350 Tyrosine metabolism	10	pos_1217;pos_1504;pos_1510;pos_164;pos_995;neg_543;neg_560;neg_697;neg_732;neg_829	5-(L-Alanin-3-yl)-2-hydroxy-cis,cis-muconate 6-semialdehyde;3-Amino-3-(4-hydroxyphenyl)propanoate;L-Normetanephrine;L-Tyrosine;3-Methoxytyramine;4-Hydroxyphenylacetylglutamic acid;4-Hydroxyphenylacetate;3-Methoxy-4-hydroxyphenylethyleneglycol;Salidroside;Dopaquinone	C04797;C04368;C05589;C00082;C05587;C05595;C00642;C05594;C06046;C00822
Metabolism	Amino acid metabolism	ko00360 Phenylalanine metabolism	9	pos_1046;pos_1233;pos_164;pos_849;pos_912;neg_560;neg_581;neg_703;neg_725	Phenylacetaldehyde;Phenylpropanoate;L-Tyrosine;trans-Cinnamate;L-Phenylalanine;4-Hydroxyphenylacetate;cis-3-(Carboxy-ethyl)-3,5-cyclo-hexadiene-1,2-diol;trans-Cinnamic acid;N-Acetyl-L-phenylalanine	C00601;C05629;C00082;C00423;C00079;C00642;C11588;C00423;C03519
Metabolism	Amino acid metabolism	ko00380 Tryptophan metabolism	13	pos_1022;pos_1039;pos_1040;pos_1089;pos_1588;pos_9273;pos_953;pos_980;neg_254;neg_332;neg_333;neg_512;neg_714	5-Hydroxyindoleacetaldehyde;5-Methoxyindoleacetate;5-Hydroxyindolepyruvate;Indolylmethyl-desulfoglucosinolate;L-Formylkynurenine;3-Methyldioxyindole;8-Methoxykynurenate;5-Methoxytryptamine;L-Tryptophan;4,8-Dihydroxyquinoline;Indolepyruvate;6-Hydroxymelatonin;5-Hydroxyindoleacetate	C05634;C05660;C05646;C16517;C02700;C05834;C05830;C05659;C00078;C05637;C00331;C05643;C05635
Metabolism	Amino acid metabolism	ko00400 Phenylalanine, tyrosine and tryptophan biosynthesis	8	pos_164;pos_8555;pos_912;pos_985;neg_254;neg_292;neg_400;neg_536	L-Tyrosine;Indoleglycerol phosphate;L-Phenylalanine;L-Homophenylalanine;L-Tryptophan;L-Arogenate;D-Erythrose 4-phosphate;Prephenate	C00082;C03506;C00079;C17235;C00078;C00826;C00279;C00254
Metabolism	Biosynthesis of other secondary metabolites	ko00232 Caffeine metabolism	1	neg_557	7-Methylxanthosine	C16352
Metabolism	Biosynthesis of other secondary metabolites	ko00254 Aflatoxin biosynthesis	7	pos_1115;pos_1176;pos_2754;neg_426;neg_772;neg_901;neg_907	Dihydrodemethylsterigmatocystin;(1'S)-Averantin;Aflatoxin G2;Aflatoxin G1;Aflatoxin B1;Versiconal;Versiconol acetate	C00078;C00826;C00279;C00254
Metabolism	Biosynthesis of other secondary metabolites	ko00261 Monobactam biosynthesis	12	pos_120;pos_163;pos_164;pos_642;pos_842;pos_987;neg_185;neg_331;neg_335;neg_41;neg_457;neg_910	Isotabtoxin;L-Arginine;L-Tyrosine;C20915;N1-Acetyl-tabtoxinine-beta-lactam;MM 42842;C20916;Isonocardicin A;C20911;Sulfate;Nocardicin C;S-Adenosyl-L-methionine	C00082;C03506;C00079;C17235;C16352
Metabolism	Biosynthesis of other secondary metabolites	ko00311 Penicillin and cephalosporin biosynthesis	7	pos_156;pos_72;pos_988;neg_464;neg_528;neg_611;neg_813	L-Valine;6-Aminopenicillanate;Isopenicillin N;Cephalosporin C;delta-(L-2-Aminoadipyl)-L-cysteinyl-D-valine;O-Carbamoyl-deacetylcephalosporin C;Deacetoxycephalosporin C	C20444;C20499;C16754;C16755;C06800;C20507;C20506
Metabolism	Biosynthesis of other secondary metabolites	ko00332 Carbapenem biosynthesis	8	pos_1002;pos_1066;pos_88;pos_989;neg_236;neg_510;neg_628;neg_914	C20822;L-Glutamate;L-Proline;Pantetheine;N-Acetylthienamycin;Pantetheine 4'-phosphate;Northienamycin;C20817	C20919;C00062;C00082;C20915;C20921;C20928;C20916;C00927;C20911;C00059;C17351;C00019
Metabolism	Biosynthesis of other secondary metabolites	ko00402 Benzoxazinoid biosynthesis	6	pos_1501;pos_2866;pos_8555;neg_232;neg_237;neg_377	HBOA;TRIBOA-glucoside;Indoleglycerol phosphate;DIBOA;DIBOA-glucoside;DIMBOA-glucoside	C00183;C02954;C05557;C00916;C05556;C06568;C06565
Metabolism	Biosynthesis of other secondary metabolites	ko00524 Neomycin, kanamycin and gentamicin biosynthesis	46	pos_1041;pos_1066;pos_1161;pos_118;pos_1381;pos_1389;pos_1585;pos_1589;pos_1710;pos_1930;pos_1984;pos_2059;pos_245;pos_2972;pos_344;pos_427;pos_4371;pos_6718;pos_6838;pos_693;pos_6969;pos_7078;pos_7582;pos_8000;pos_8002;pos_8009;pos_8044;pos_8202;pos_8206;pos_8461;pos_8575;pos_8806;pos_8927;pos_9018;pos_9019;pos_954;pos_958;pos_9651;pos_9658;neg_1103;neg_1256;neg_259;neg_509;neg_550;neg_646;neg_6…	6'-Oxolividamine;L-Glutamate;Kanamycin X;4'-Oxonebramine;Antibiotic G-418;Nebramine;6'-Oxo-G418;Kanamycin B;2-Deoxystreptamine;2'-Dehydrokanamycin A;Gentamicin C2;Gentamicin C1a;6'-Dehydro-6'-oxoparomamine;5''-Phosphoribosylparomamine;2'-N-Acetylparomamine;Gentamicin C1;Nebramycin factor 4;Kanamycin D;Antibiotic JI-20A;Neomycin B;6'-Oxokanamycin C;UDP-glucose;6'''-Deamino-6'''-oxoneomycin C;3''-O…	C20822;C00025;C00148;C00831;C17377;C01134;C17369;C20817
Metabolism	Biosynthesis of other secondary metabolites	ko00901 Indole alkaloid biosynthesis	22	pos_1107;pos_1431;pos_1436;pos_1751;pos_254;pos_6745;pos_6958;pos_879;pos_8951;pos_9209;pos_9356;neg_1034;neg_115;neg_1159;neg_1239;neg_254;neg_424;neg_46;neg_642;neg_684;neg_855;neg_981	Psilocin;Deacetylvindoline;Fumigaclavine C;Secologanin;6,8-Dimethyl-6,7,8,9-tetradehydroergoline;Ergotamine;Vinblastine;Vindoline;Desacetylvindoline;Ajmaline;Fumigaclavine B	C15769;C18062;C03506;C15770;C15772;C04831
Metabolism	Biosynthesis of other secondary metabolites	ko00940 Phenylpropanoid biosynthesis	14	pos_1074;pos_1122;pos_1174;pos_128;pos_164;pos_849;pos_887;pos_894;pos_912;pos_9201;pos_9587;neg_546;neg_703;neg_876	Ferulate;5-Hydroxyconiferaldehyde;4-Hydroxy-3-methoxycinnamaldehyde;Caffeic aldehyde;L-Tyrosine;trans-Cinnamate;p-Coumaroyl quinic acid;Sinapine;L-Phenylalanine;Coniferin;Coniferyl aldehyde;4-Coumaroylshikimate;trans-Cinnamic acid;Syringin	C21256;C00025;C20614;C21258;C17703;C21259;C21268;C00825;C02627;C20509;C02033;C00908;C17583;C21260;C17582;C07656;C18000;C21253;C17704;C01737;C21252;C00029;C17589;C21176;C18002;C01759;C17584;C17588;C18003;C20351;C01441;C18005;C18001;C17705;C17585;C01743;C17701;C01917;C21261;C17702;C21263;C20353;C18004;C21267;C21251;C21266
Metabolism	Biosynthesis of other secondary metabolites	ko00941 Flavonoid biosynthesis	9	pos_1276;pos_145;pos_837;pos_8615;pos_887;neg_546;neg_71;neg_761;neg_908	Vitexin;(-)-Epicatechin;cis-3,4-Leucopelargonidin;Phlorizin;p-Coumaroyl quinic acid;4-Coumaroylshikimate;Leucocyanidin;Pinobanksin 3-O-acetate;2',3,4,4',6'-Peptahydroxychalcone 4'-O-glucoside	C08312;C01091;C20438;C01852;C20457;C07544;C07201;C01626;C01091;C06542;C20437;C11642;C09244;C11691;C04578;C00078;C03309;C21778;C07204;C20379;C03470;C11784
Metabolism	Biosynthesis of other secondary metabolites	ko00942 Anthocyanin biosynthesis	9	pos_1108;pos_1190;pos_2529;pos_7585;pos_8021;pos_999;neg_242;neg_415;neg_589	Cyanin;Pelargonin;Pelargonidin 3-O-beta-D-sambubioside;Pelargonidin 3-O-rutinoside;Peonidin-3-(p-coumaroyl)-rutinoside-5-glucoside;Cyanidin 3-O-rutinoside 5-O-beta-D-glucoside;Petunidin 3-O-glucoside;Pelargonidin 3-(6-p-coumaroyl)glucoside;Malvidin 3-O-glucoside	C01494;C12204;C02666;C10945;C00082;C00423;C12208;C00933;C00079;C00761;C02666;C02947;C00423;C01533
Metabolism	Biosynthesis of other secondary metabolites	ko00943 Isoflavonoid biosynthesis	15	pos_1204;pos_1643;pos_1727;pos_3026;pos_4116;pos_4370;neg_321;neg_324;neg_367;neg_461;neg_687;neg_807;neg_834;neg_848;neg_888	Formononetin;Biochanin A 7-O-(6-O-malonyl-beta-D-glucoside);Pisatin;Isoformononetin;(-)-Vestitol;Pseudobaptigenin;5-Hydroxypseudobaptigenin;Malonyldaidzin;Medicarpin 3-O-glucoside-6'-malonate;Glyceocarpin;Glycitin;Medicarpin;Coumestrol;(-)-Maackiain;Biochanin A	C01460;C09727;C03648;C01604;C12208;C02947;C05906;C16418;C16408
Metabolism	Biosynthesis of other secondary metabolites	ko00944 Flavone and flavonol biosynthesis	22	pos_1068;pos_1171;pos_1187;pos_1245;pos_1276;pos_1645;pos_1795;pos_2347;pos_2559;pos_2733;pos_854;neg_350;neg_383;neg_384;neg_412;neg_414;neg_418;neg_428;neg_454;neg_491;neg_591;neg_89	Kaempferol 3-O-rhamnoside-7-O-glucoside;Isoswertisin 2''-rhamnoside;Kaempferide;Isovitexin;Vitexin;Quercetin 3-O-[beta-D-xylosyl-(1->2)-beta-D-glucoside];3,7-Di-O-methylquercetin;Laricitrin;Malonylapiin;Kaempferol 3-O-[6-(4-coumaroyl)-beta-D-glucosyl-(1->2)-beta-D-glucosyl-(1->2)-beta-D-glucoside];Luteolin 7-O-beta-D-glucoside;Kaempferol-3-O-rutinoside;Rutin;Quercetin 3-O-rhamnoside 7-O-glucoside…	C08639;C08725;C20489;C12644;C16293;C12646;C12139;C16368;C12140
Metabolism	Biosynthesis of other secondary metabolites	ko00945 Stilbenoid, diarylheptanoid and gingerol biosynthesis	11	pos_1401;pos_1800;pos_2744;pos_887;pos_8876;pos_928;pos_960;neg_247;neg_341;neg_546;neg_700	Bisdemethoxycurcumin;1-(3,4-Dihydroxyphenyl)-1-decene-3,5-dione;1-(4-Hydroxyphenyl)-1-decene-3,5-dione;p-Coumaroyl quinic acid;[6]-Gingerol;5-Hydroxy-1-(4-hydroxyphenyl)-3-decanone;1-Dehydro-[6]-gingerdione;Demethoxycurcumin;Curcumin;4-Coumaroylshikimate;Curcumin monoglucoside	C00858;C12625;C10516;C12125;C16225;C10522;C19727;C16191;C16224;C15509;C16195;C10503;C10205;C10502;C00814
Metabolism	Biosynthesis of other secondary metabolites	ko00950 Isoquinoline alkaloid biosynthesis	41	pos_1017;pos_1034;pos_1053;pos_1081;pos_1316;pos_1423;pos_1430;pos_1448;pos_147;pos_164;pos_1751;pos_468;pos_581;pos_586;pos_6520;pos_855;pos_891;pos_8977;pos_901;pos_9124;pos_9208;pos_9245;pos_9647;pos_9829;neg_1029;neg_1045;neg_1137;neg_1206;neg_1257;neg_223;neg_245;neg_264;neg_371;neg_443;neg_625;neg_749;neg_750;neg_753;neg_806;neg_825;neg_863	Protopine;3'-Hydroxy-N-methyl-(S)-coclaurine;Protoemetine;(S)-Reticuline;Codeine;1,2-Dehydroreticuline;6-O-Methyl-N-deacetylisoipecoside aglycon;Deacetylisoipecoside;Elwesine;L-Tyrosine;Secologanin;Tetrandrine;Papaveroxine;(13S,14R)-1,13-Dihydroxy-N-methylcanadine;Alangiside;(S)-Scoulerine;Colchicine;Deacetylcolchicine;Norbelladine;Cephaeline;(4aS,10bR)-Noroxomaritidine;Ankorine;Haemanthamine;2'-…	C21854;C12629;C10098;C01714;C01460;C12637;C01265;C12633;C05622;C12636;C03951;C21833;C05625;C19796;C04858;C12668;C12634;C12249;C04024;C12627;C04858;C00616
Metabolism	Biosynthesis of other secondary metabolites	ko00960 Tropane, piperidine and pyridine alkaloid biosynthesis	16	pos_1009;pos_107;pos_1114;pos_1230;pos_140;pos_1729;pos_3082;pos_6259;pos_8475;pos_866;pos_869;pos_912;pos_9308;pos_9315;pos_994;neg_1027	Retronecine;5-Aminopentanal;Ecgonine methyl ester;Slaframine;L-Isoleucine;Nicotine;Senecionine;Lobeline;Senecionine N-oxide;Atropine;Ecgonine;L-Phenylalanine;Cytisine;13-Hydroxylupanine;L-(+)-Anaferine;L-Lysine	C17743;C17745;C17744;C12208;C10462;C17747;C17746;C17742;C10443;C02947;C17749
Metabolism	Biosynthesis of other secondary metabolites	ko00965 Betalain biosynthesis	8	pos_1095;pos_164;pos_2545;pos_929;pos_995;neg_299;neg_370;neg_505	Betalamic acid;L-Tyrosine;cyclo-Dopa-glucuronylglucoside;Portulacaxanthin II;3-Methoxytyramine;Dopaxanthin;Miraxanthin-V;Betanin	C05189;C05202;C11816;C02105;C06174;C06167;C21583;C07304;C21637;C00082;C01852;C09654;C20299;C21587;C09330;C02106;C07592;C16712;C16701;C09390;C21405;C09337;C08527;C06512;C06175;C06171;C05177;C09328;C09248;C16708;C02134;C06327;C09581;C21589;C21588;C01795;C05220;C03329;C21566;C05315;C06163
Metabolism	Biosynthesis of other secondary metabolites	ko00966 Glucosinolate biosynthesis	18	pos_1082;pos_1089;pos_140;pos_156;pos_164;pos_2693;pos_8992;pos_912;pos_9134;pos_925;pos_934;pos_983;pos_985;neg_1042;neg_254;neg_716;neg_832;neg_956	Hexahomomethionine;Indolylmethyl-desulfoglucosinolate;L-Isoleucine;L-Valine;L-Tyrosine;2-(3'-Methylthio)propylmalic acid;L-Leucine;L-Phenylalanine;9-Methylthiononanaldoxime;2-(7'-Methylthio)heptylmalic acid;p-Hydroxybenzyldesulphoglucosinolate;5-Methylthiopentanaldoxime;L-Homophenylalanine;8-Methylthiooctanaldoxime;L-Tryptophan;S-(4-Methylthiobutylthiohydroximoyl)-L-cysteine;4-Methylthiobutyl-des…	C06177;C12455;C12448;C06185;C00407;C00745;C06176;C07475;C15612;C01479;C10858;C00079;C10763;C02621;C06183;C00047
Metabolism	Biosynthesis of other secondary metabolites	ko00996 Biosynthesis of various alkaloids	13	pos_2289;pos_278;pos_7581;pos_849;pos_912;pos_9668;pos_9786;neg_1096;neg_254;neg_536;neg_703;neg_852;neg_855	Cucurbitacin D;Solanine;Cucurbitacin B;trans-Cinnamate;L-Phenylalanine;Tomatidine;Capsaicin;Cucurbitacin E;L-Tryptophan;Prephenate;trans-Cinnamic acid;Rutacridone;3-alpha(S)-Strictosidine	C08538;C00082;C17752;C08565;C05587;C08543;C08557;C08540
Metabolism	Biosynthesis of other secondary metabolites	ko00999 Biosynthesis of various plant secondary metabolites	30	pos_1007;pos_1010;pos_1032;pos_1318;pos_1501;pos_1565;pos_164;pos_2866;pos_716;pos_849;pos_8555;pos_8781;pos_912;pos_9187;pos_9464;pos_963;pos_9660;neg_145;neg_232;neg_237;neg_254;neg_377;neg_405;neg_501;neg_536;neg_644;neg_703;neg_856;neg_910;neg_98	p-Coumaroylagmatine;Feruloylagmatine;trans-beta-D-Glucosyl-2-hydroxycinnamate;trans-Crocetin (beta-D-glucosyl) (beta-D-gentibiosyl) ester;HBOA;Geranylgeranyl diphosphate;L-Tyrosine;TRIBOA-glucoside;Zeaxanthin;trans-Cinnamate;Indoleglycerol phosphate;Lariciresinol;L-Phenylalanine;Cannabigerolate;Coumarin;Bursehernin;beta-D-Gentiobiosyl crocetin;Picrocrocin;DIBOA;DIBOA-glucoside;L-Tryptophan;DIMBOA…	C17233;C16517;C00407;C00183;C00082;C17214;C00123;C00079;C17253;C17230;C17240;C17245;C17235;C17251;C00078;C17242;C17248;C17244
Metabolism	Carbohydrate metabolism	ko00010 Glycolysis / Gluconeogenesis	2	pos_2488;neg_632	Salicin;Arbutin	C08796;C10820;C08794;C00423;C00079;C10826;C06866;C08797;C00078;C00254;C00423;C10738;C03470
Metabolism	Carbohydrate metabolism	ko00020 Citrate cycle (TCA cycle)	4	pos_4299;neg_67;neg_69;neg_77	3-Carboxy-1-hydroxypropyl-ThPP;Citrate;L-Malic acid;Citric acid	C04498;C18325;C05158;C17513;C15769;C00353;C00082;C18062;C06098;C00423;C03506;C10646;C00079;C20406;C05851;C21183;C19869;C17055;C15770;C15772;C00078;C04831;C01752;C01527;C00254;C10784;C00423;C00448;C00019;C19868
Metabolism	Carbohydrate metabolism	ko00030 Pentose phosphate pathway	3	neg_325;neg_400;neg_553	D-Glucosaminate-6-phosphate;D-Erythrose 4-phosphate;2-Amino-2-deoxy-D-gluconate	C20589;C00279;C03752
Metabolism	Carbohydrate metabolism	ko00040 Pentose and glucuronate interconversions	2	pos_7078;pos_938	UDP-glucose;Xylitol	C00029;C00379
Metabolism	Carbohydrate metabolism	ko00051 Fructose and mannose metabolism	4	pos_100;pos_82;pos_8564;neg_619	D-Mannitol 1-phosphate;L-Fuconate;GDP-L-fucose;L-Rhamnose	C00644;C01720;C00325;C00507
Metabolism	Carbohydrate metabolism	ko00052 Galactose metabolism	5	pos_1263;pos_1472;pos_7078;neg_539;neg_636	Sucrose;3-beta-D-Galactosyl-sn-glycerol;UDP-glucose;Raffinose;Stachyose	C00089;C05401;C00029;C00492;C01613
Metabolism	Carbohydrate metabolism	ko00053 Ascorbate and aldarate metabolism	4	pos_1220;pos_7078;neg_306;neg_334	3-Dehydro-L-threonate;UDP-glucose;D-Galactaro-1,5-lactone;1-Phospho-alpha-D-galacturonate	C03064;C00029;C20889;C04037
Metabolism	Carbohydrate metabolism	ko00500 Starch and sucrose metabolism	3	pos_1263;pos_2789;pos_7078	Sucrose;3-Ketosucrose;UDP-glucose	C00089;C05731;C00029
Metabolism	Carbohydrate metabolism	ko00520 Amino sugar and nucleotide sugar metabolism	17	pos_1124;pos_1241;pos_153;pos_1685;pos_2232;pos_2642;pos_6099;pos_7078;pos_8564;pos_8798;neg_267;neg_334;neg_372;neg_564;neg_708;neg_793;neg_84	N-Acetyl-D-glucosamine;N-Acetylmuramate;N-Acetylmuramic acid alpha-1-phosphate;CMP-N-acetylneuraminate;2,4-Bis(acetamido)-2,4,6-trideoxy-beta-L-altropyranose;GDP-4-acetamido-4,6-dideoxy-alpha-D-mannose;Pseudaminic acid;UDP-glucose;GDP-L-fucose;CMP-pseudaminic acid;N-Glycoloyl-neuraminate;1-Phospho-alpha-D-galacturonate;Chitobiose;N-Acetylneuraminate;Undecaprenyl phosphate alpha-L-Ara4N;CMP-N-glyc…	C00140;C02713;C21027;C00128;C19972;C20672;C20082;C00029;C00325;C20083;C03410;C04037;C01674;C00270;C16157;C03691;C11521
Metabolism	Carbohydrate metabolism	ko00620 Pyruvate metabolism	3	neg_13;neg_252;neg_69	Acetyl phosphate;alpha-Isopropylmalate;L-Malic acid	C00227;C02504;C00149
Metabolism	Carbohydrate metabolism	ko00630 Glyoxylate and dicarboxylate metabolism	5	pos_1066;neg_243;neg_67;neg_69;neg_77	L-Glutamate;3-Propylmalate;Citrate;L-Malic acid;Citric acid	C00025;C02123;C00158;C00149;C00158
Metabolism	Carbohydrate metabolism	ko00640 Propanoate metabolism	1	pos_6651	Propionyladenylate	C05983
Metabolism	Carbohydrate metabolism	ko00650 Butanoate metabolism	1	pos_1066	L-Glutamate	C00025
Metabolism	Carbohydrate metabolism	ko00660 C5-Branched dibasic acid metabolism	1	pos_1066	L-Glutamate	C00025
Metabolism	Energy metabolism	ko00190 Oxidative phosphorylation	3	pos_1164;pos_221;pos_2339	FMN;Triphosphate;NAD+	C00061;C00536;C00003
Metabolism	Energy metabolism	ko00195 Photosynthesis	2	pos_2343;pos_8727	NADPH;Plastoquinol-1	C00005;C02185
Metabolism	Energy metabolism	ko00710 Carbon fixation in photosynthetic organisms	2	neg_400;neg_69	D-Erythrose 4-phosphate;L-Malic acid	C00279;C00149
Metabolism	Energy metabolism	ko00910 Nitrogen metabolism	1	pos_1066	L-Glutamate	C00025
Metabolism	Energy metabolism	ko00920 Sulfur metabolism	2	pos_831;neg_41	Thiosulfate;Sulfate	C00320;C00059
Metabolism	Lipid metabolism	ko00061 Fatty acid biosynthesis	6	pos_1661;pos_2283;pos_9010;pos_9278;neg_1043;neg_1070	Octanoic acid;Caprylic acid;Dodecanoic acid;Decanoic acid;(9Z)-Hexadecenoic acid;Hexadecanoic acid	C06423;C06423;C02679;C01571;C08362;C00249
Metabolism	Lipid metabolism	ko00062 Fatty acid elongation	4	pos_6030;pos_6972;pos_8624;neg_1070	(S)-3-Hydroxyoctanoyl-CoA;(S)-3-Hydroxydodecanoyl-CoA;Lauroyl-CoA;Hexadecanoic acid	C05266;C05262;C01832;C00249
Metabolism	Lipid metabolism	ko00071 Fatty acid degradation	6	pos_1524;pos_355;pos_6030;pos_6972;pos_8624;neg_1070	L-Palmitoylcarnitine;1-Hexadecanol;(S)-3-Hydroxyoctanoyl-CoA;(S)-3-Hydroxydodecanoyl-CoA;Lauroyl-CoA;Hexadecanoic acid	C02990;C00823;C05266;C05262;C01832;C00249
Metabolism	Lipid metabolism	ko00073 Cutin, suberine and wax biosynthesis	12	pos_2854;pos_8649;pos_9006;pos_9097;pos_9120;pos_9381;pos_9519;neg_1070;neg_1186;neg_1222;neg_942;neg_954	Hexadecanedioic acid;9,10-Dihydroxystearate;22-Hydroxydocosanoate;Docosanoic acid;9,10-Epoxy-18-hydroxystearate;9,10,18-Trihydroxystearate;16-Feruloyloxypalmitate;Dihydroxyhexadecanoic acid;Hexadecanedioate	C19615;C19622;C19623;C08281;C19620;C19621;C18217;C00249;C18218;C19625;C08285;C19615
Metabolism	Lipid metabolism	ko00100 Steroid biosynthesis	14	pos_251;pos_285;pos_410;pos_4417;pos_489;pos_522;pos_6460;pos_7764;pos_9034;pos_9157;pos_9376;pos_9554;pos_9813;neg_856	3beta-Hydroxyergosta-7,24(24(1))-dien-4alpha-carboxylate;Obtusifoliol;4alpha-Methylzymosterol;Zymosterone;5,7,24(28)-Ergostatrienol;3beta-Hydroxy-4beta,14alpha-dimethyl-9beta,19-cyclo-5alpha-ergost-24(24(1))-en-4alpha-carboxylate;Ergosta-5,7,22,24(28)-tetraen-3beta-ol;Vitamin D3;Campesterol;7-Dehydrocholesterol;4,4-Dimethyl-5alpha-cholesta-8-en-3beta-ol;Calcitriol;4alpha-Carboxy-stigmasta-7,24(24…	C22119;C01943;C05103;C22136;C15780;C22116;C05440;C05443;C01789;C01164;C15915;C01673;C22120;C00448
Metabolism	Lipid metabolism	ko00561 Glycerolipid metabolism	3	pos_1472;pos_7078;neg_84	3-beta-D-Galactosyl-sn-glycerol;UDP-glucose;UDP-6-sulfoquinovose	C05401;C00029;C11521
Metabolism	Lipid metabolism	ko00564 Glycerophospholipid metabolism	5	pos_1708;pos_73;pos_81;pos_8948;neg_760	3-(O-Geranylgeranyl)-sn-glycerol 1-phosphate;Choline;N-Methylethanolamine phosphate;2,3-Bis-O-(geranylgeranyl)glycerol 1-phosphate;CDP-choline	C04590;C00114;C01210;C04638;C00307
Metabolism	Lipid metabolism	ko00590 Arachidonic acid metabolism	24	pos_1113;pos_151;pos_2276;pos_433;pos_493;pos_6105;pos_654;pos_7171;pos_748;pos_7614;pos_8750;pos_8878;pos_9147;pos_9166;pos_9361;pos_9575;pos_991;neg_1066;neg_1129;neg_1148;neg_138;neg_195;neg_904;neg_928	6-Keto-prostaglandin F1alpha;20-COOH-Leukotriene B4;12(S)-HETE;11,12-EET;9(S)-HETE;Prostaglandin A2;20-Hydroxyleukotriene E4;Thromboxane B2;5,6-DHET;15(S)-HPETE;Prostaglandin J2;11-Dehydro-thromboxane B2;Leukotriene B4;Prostaglandin F2alpha;5(S)-HETE;5,6-EET;6-Keto-prostaglandin E1;Leukotriene A4;Leukotriene E4;2,3-Dinor-8-iso prostaglandin F2alpha;Prostaglandin B2;(15S)-15-Hydroxy-5,8,11-cis-13-…	C05961;C05950;C14777;C14770;C14779;C05953;C03577;C05963;C14772;C05966;C05957;C05964;C02165;C00639;C04805;C14768;C05962;C00909;C05952;C14794;C05954;C04742;C05951;C14795
Metabolism	Lipid metabolism	ko00591 Linoleic acid metabolism	13	pos_2781;pos_527;pos_6265;pos_7587;pos_9086;pos_9146;pos_9274;neg_1003;neg_1021;neg_1030;neg_917;neg_966;neg_996	13-OxoODE;12,13-DHOME;9,10-Dihydroxy-12,13-epoxyoctadecanoic acid;(6Z,9Z,12Z)-Octadecatrienoic acid;9(10)-EpOME;9-OxoODE;Crepenynate;9(S)-HpODE;(9Z,11E)-(13S)-13-Hydroperoxyoctadeca-9,11-dienoic acid;13(S)-HODE;9,12,13-TriHOME;Dihomo-gamma-Linolenic Acid;13(S)-HpODE	C14765;C14829;C14837;C06426;C14825;C14766;C07289;C14827;C04717;C14762;C14833;C03242;C04717
Metabolism	Lipid metabolism	ko00592 alpha-Linolenic acid metabolism	22	pos_1193;pos_127;pos_1429;pos_2316;pos_5348;pos_6386;pos_6983;pos_7674;pos_860;pos_8889;pos_8922;pos_8979;pos_8990;pos_9040;pos_9060;pos_9065;pos_9765;neg_1001;neg_1044;neg_897;neg_957;neg_964	Volicitin;(Z)-3-Hexen-1-ol acetate;(-)-Jasmonic acid;12-Oxo-9(Z)-dodecenoic acid;OPC4-CoA;Heptadecatrienal;OPC6-CoA;3-Oxo-OPC6-CoA;Methyl jasmonate;12-OPDA;10-OPDA;9(S)-HpOTrE;trans-2-Enoyl-OPC8-CoA;13(S)-HOT;Stearidonic Acid;2(R)-HPOT;2(R)-HOT;13(S)-HPOT;9(S)-HOTrE;Etherolenic acid;9-Hydroxy-12-oxo-10(E),15(Z)-octadecadienoic acid;Colnelenic acid	C16345;C19757;C08491;C16311;C16335;C16343;C16331;C16334;C11512;C01226;C16325;C16321;C16328;C16316;C16300;C16341;C16342;C04785;C16326;C16319;C21923;C16320
Metabolism	Lipid metabolism	ko00600 Sphingolipid metabolism	6	pos_2219;pos_362;pos_5457;pos_8880;pos_8892;neg_1055	Sphingosyl-phosphocholine;Sphingosine;Phytosphingosine;Sphinganine;Dihydrosphingosine;Sphinganine 1-phosphate	C03640;C00319;C12144;C00836;C00836;C01120
Metabolism	Lipid metabolism	ko01040 Biosynthesis of unsaturated fatty acids	14	pos_4522;pos_6173;pos_7273;pos_7587;pos_7676;pos_8874;pos_8895;pos_8945;pos_8981;pos_9081;pos_9097;pos_9751;neg_1070;neg_966	(8Z,11Z,14Z,17Z,20Z)-Hexacosapentaenoyl-CoA;Tetracosanoyl-CoA;Docosapentaenoic acid;(6Z,9Z,12Z)-Octadecatrienoic acid;(5Z,8Z,11Z,14Z,17Z)-Icosapentaenoyl-CoA;Oleoyl-CoA;Icosenoic acid;(7Z,10Z,13Z,16Z,19Z)-Docosapentaenoic acid;(13Z,16Z)-Docosadienoic acid;Tetracosanoic acid;Docosanoic acid;Icosatrienoic acid;Hexadecanoic acid;Dihomo-gamma-Linolenic Acid	C21965;C16529;C16513;C06426;C16165;C00510;C16526;C16513;C16533;C08320;C08281;C16522;C00249;C03242
Metabolism	Metabolism of cofactors and vitamins	ko00130 Ubiquinone and other terpenoid-quinone biosynthesis	14	pos_1065;pos_1414;pos_1565;pos_164;pos_4691;pos_510;pos_6644;pos_849;pos_8898;pos_90;pos_9170;neg_1150;neg_225;neg_703	Dihydroechinofuran;Cyclic dehypoxanthine futalosine;Geranylgeranyl diphosphate;L-Tyrosine;Plastoquinol-9;all-trans-Nonaprenyl diphosphate;beta-Tocotrienol;trans-Cinnamate;gamma-Tocopherol;2-Succinyl-5-enolpyruvyl-6-hydroxy-3-cyclohexene-1-carboxylate;alpha-Tocotrienol;Dihydroshikonofuran;4-(beta-D-Glucosyloxy)benzoate;trans-Cinnamic acid	C18134;C17017;C00353;C00082;C16695;C04145;C14154;C00423;C02483;C16519;C14153;C18135;C03993;C00423
Metabolism	Metabolism of cofactors and vitamins	ko00670 One carbon pool by folate	3	pos_845;pos_92;neg_338	5,10-Methenyltetrahydrofolate;5,10-Methylenetetrahydrofolate;Folinic acid	C00445;C00143;C03479
Metabolism	Metabolism of cofactors and vitamins	ko00730 Thiamine metabolism	5	pos_1348;pos_164;pos_2339;pos_3019;pos_68	Thiamine aldehyde;L-Tyrosine;NAD+;Thiamin triphosphate;Aminoimidazole ribotide	C05856;C00082;C00003;C03028;C03373
Metabolism	Metabolism of cofactors and vitamins	ko00740 Riboflavin metabolism	8	pos_1164;pos_7457;pos_7630;pos_986;neg_308;neg_404;neg_711;neg_782	FMN;Reduced riboflavin;Riboflavin;2-Amino-5-formylamino-6-(5-phospho-D-ribosylamino)pyrimidin-4(3H)-one;5-Amino-6-(5'-phospho-D-ribitylamino)uracil;5-Amino-6-(5'-phosphoribosylamino)uracil;2,5-Diamino-6-(5-phospho-D-ribitylamino)pyrimidin-4(3H)-one;7-Hydroxy-6-methyl-8-ribityllumazine	C00061;C01007;C00255;C15563;C04454;C01268;C18910;C05995
Metabolism	Metabolism of cofactors and vitamins	ko00750 Vitamin B6 metabolism	8	pos_1094;pos_1290;pos_1402;pos_862;pos_959;neg_342;neg_400;neg_757	4-Pyridoxic acid;3-Hydroxy-4-hydroxymethyl-2-methylpyridine-5-carboxylate;4-Pyridoxate;2-Methyl-3-hydroxy-5-formylpyridine-4-carboxylate;4-Hydroxy-L-threonine;2-(Acetamidomethylene)succinate;D-Erythrose 4-phosphate;Pyridoxamine phosphate	C00847;C04773;C00847;C06050;C06056;C01215;C00279;C00647
Metabolism	Metabolism of cofactors and vitamins	ko00760 Nicotinate and nicotinamide metabolism	7	pos_1072;pos_1133;pos_1238;pos_1292;pos_2339;neg_466;neg_574	Nicotinamide-beta-riboside;Nicotinate D-ribonucleotide;N1-Methyl-2-pyridone-5-carboxamide;Nicotinate D-ribonucleoside;NAD+;6-Hydroxy-3-succinoylpyridine;2,6-Dihydroxypseudooxynicotine	C03150;C01185;C05842;C05841;C00003;C19631;C15986
Metabolism	Metabolism of cofactors and vitamins	ko00770 Pantothenate and CoA biosynthesis	9	pos_1343;pos_1551;pos_156;pos_6286;pos_876;pos_989;neg_360;neg_441;neg_510	2-Dehydropantoate;(R)-4-Phosphopantoate;L-Valine;Dephospho-CoA;Pantothenate;Pantetheine;D-4'-Phosphopantothenate;N-((R)-Pantothenoyl)-L-cysteine;Pantetheine 4'-phosphate	C00966;C18911;C00183;C00882;C00864;C00831;C03492;C04079;C01134
Metabolism	Metabolism of cofactors and vitamins	ko00780 Biotin metabolism	3	pos_1449;neg_1027;neg_525	Biotin sulfoxide;L-Lysine;Biotin sulfone	C20386;C00047;C20387
Metabolism	Metabolism of cofactors and vitamins	ko00785 Lipoic acid metabolism	2	pos_1661;pos_2283	Octanoic acid;Caprylic acid	C06423;C06423
Metabolism	Metabolism of cofactors and vitamins	ko00790 Folate biosynthesis	7	pos_1003;pos_1999;pos_900;pos_9385;neg_265;neg_375;neg_556	Dihydropteroate;Formamidopyrimidine nucleoside triphosphate;7,8-Dihydroneopterin;Tetrahydrobiopterin;4-Amino-4-deoxychorismate;Sepiapterin;N-[(7,8-Dihydropterin-6-yl)methyl]-4-(beta-D-ribofuranosyl)aniline 5'-phosphate	C00921;C05922;C04874;C00272;C11355;C00835;C20562
Metabolism	Metabolism of cofactors and vitamins	ko00860 Porphyrin metabolism	26	pos_1066;pos_1101;pos_1202;pos_1255;pos_335;pos_4505;pos_6408;pos_6637;pos_68;pos_685;pos_7084;pos_8373;pos_8630;pos_9462;pos_9510;pos_9641;pos_9847;pos_9855;neg_1223;neg_456;neg_499;neg_515;neg_584;neg_752;neg_784;neg_97	L-Glutamate;Chlorophyllide;Biliverdin-IX-beta;Porphobilinogen;I-Urobilinogen;Chlorophyll a;D-Urobilinogen;N1-(5-Phospho-alpha-D-ribosyl)-5,6-dimethylbenzimidazole;Aminoimidazole ribotide;Biliverdin;L-Urobilin;Hydrogenobyrinate;L-Urobilinogen;Bacteriopheophytin;Coproporphyrin I;5-Oxo-delta-bilirubin;Pheophorbide a;D-Urobilin;Red chlorophyll catabolite;Hydroxymethylbilane;8,12-Diethyl-3-vinylbacter…	C00025;C02139;C21724;C00931;C05790;C05306;C05791;C04778;C03373;C00500;C05793;C06399;C05789;C05798;C05769;C20666;C18021;C05795;C18022;C01024;C21427;C06504;C04536;C18098;C18064;C05913
Metabolism	Metabolism of other amino acids	ko00410 beta-Alanine metabolism	5	pos_1025;pos_876;pos_9133;pos_94;neg_360	beta-Nitropropanoate;Pantothenate;beta-Alanyl-L-lysine;4-Aminobutyraldehyde;D-4'-Phosphopantothenate	C05669;C00864;C05341;C00555;C03492
Metabolism	Metabolism of other amino acids	ko00430 Taurine and hypotaurine metabolism	4	pos_1066;neg_1145;neg_13;neg_217	L-Glutamate;Taurocholate;Acetyl phosphate;5-L-Glutamyl-taurine	C00025;C05122;C00227;C05844
Metabolism	Metabolism of other amino acids	ko00440 Phosphonate and phosphinate metabolism	9	pos_1409;pos_1704;pos_2052;pos_2220;pos_6491;pos_741;neg_307;neg_401;neg_650	CMP-N-trimethyl-2-aminoethylphosphonate;N-Acetylphosphinothricin;Rhizocticin B;Ciliatocholate;Rhizocticin C;Phosphonoacetaldehyde;N-Acetyldemethylphosphinothricin tripeptide;Rhizocticin A;Bialaphos	C05674;C17952;C17940;C05683;C17960;C03167;C17950;C17944;C06457
Metabolism	Metabolism of other amino acids	ko00460 Cyanoamino acid metabolism	9	pos_1182;pos_140;pos_156;pos_164;pos_2992;pos_912;neg_44;neg_492;neg_621	Amygdalin;L-Isoleucine;L-Valine;L-Tyrosine;Linamarin;L-Phenylalanine;L-Asparagine;Dhurrin;3-Cyano-L-alanine	C08325;C00407;C00183;C00082;C01594;C00079;C00152;C05143;C02512
Metabolism	Metabolism of other amino acids	ko00470 D-Amino acid metabolism	9	pos_1066;pos_163;pos_4962;pos_74;pos_76;pos_88;pos_912;neg_1027;neg_575	L-Glutamate;L-Arginine;Linatine;5-Aminopentanoate;D-Glutamic acid;L-Proline;L-Phenylalanine;L-Lysine;5-Guanidino-2-oxopentanoate	C00025;C00062;C05939;C00431;C00217;C00148;C00079;C00047;C03771
Metabolism	Metabolism of other amino acids	ko00480 Glutathione metabolism	11	pos_1066;pos_1251;pos_1257;pos_2124;pos_2343;pos_6273;pos_6923;pos_8022;pos_9049;neg_142;neg_835	L-Glutamate;Homotrypanothione disulfide;Trypanothione;gamma-L-Glutamyl-L-cysteine;NADPH;Homotrypanothione;Bis(glutathionyl)spermine disulfide;Glutathionylaminopropylcadaverine;Glutathionylspermidine;Glutathionylspermine;Glutathione	C00025;C16568;C02090;C00669;C00005;C16567;C16564;C16566;C05730;C16562;C00051
Metabolism	Metabolism of terpenoids and polyketides	ko00523 Polyketide sugar unit biosynthesis	7	pos_1070;pos_1410;pos_2663;pos_2806;pos_3707;pos_7693;neg_397	dTDP-3-amino-2,3,6-trideoxy-4-keto-D-glucose;dTDP-L-megosamine;dTDP-D-desosamine;dTDP-4-dimethylamino-4,6-dideoxy-5-C-methyl-D-allose;dTDP-3-amino-3,4,6-trideoxy-D-glucose;dTDP-3,4-dioxo-2,6-dideoxy-D-glucose;dTDP-4-oxo-2-deoxy-alpha-D-pentos-2-ene	C12318;C11919;C11911;C11447;C11910;C06620;C21352
Metabolism	Metabolism of terpenoids and polyketides	ko00900 Terpenoid backbone biosynthesis	9	pos_111;pos_1293;pos_1565;pos_454;pos_510;pos_8455;neg_104;neg_1080;neg_856	2-C-Methyl-D-erythritol 2,4-cyclodiphosphate;all-trans-Hexaprenyl diphosphate;Geranylgeranyl diphosphate;di-trans,poly-cis-Undecaprenyl diphosphate;all-trans-Nonaprenyl diphosphate;Farnesylcysteine;(R)-Mevalonate;all-trans-Heptaprenyl diphosphate;trans,trans-Farnesyl diphosphate	C11453;C01230;C00353;C04574;C04145;C19691;C00418;C04216;C00448
Metabolism	Metabolism of terpenoids and polyketides	ko00902 Monoterpenoid biosynthesis	11	pos_1033;pos_1096;pos_130;pos_1419;pos_1460;pos_1586;pos_1751;pos_6812;pos_8998;neg_537;neg_819	Secologanate;Loganate;7-Deoxyloganetin;Deoxyloganin;(-)-alpha-Terpineol;10-Deoxygeniposidic acid;Secologanin;7-Deoxyloganate;(-)-trans-Carveol;Loganin;Asperuloside	C01957;C01512;C20790;C06071;C11393;C11672;C01852;C11636;C00964;C01433;C09769
Metabolism	Metabolism of terpenoids and polyketides	ko00903 Limonene and pinene degradation	3	pos_1596;pos_6341;pos_8998	(4R,7R)-4-Isopropenyl-7-methyl-2-oxo-oxepanone;4-Isopropenyl-2-oxy-cyclohexanecarboxyl-CoA;(-)-trans-Carveol	C11402;C11935;C00964
Metabolism	Metabolism of terpenoids and polyketides	ko00904 Diterpenoid biosynthesis	34	pos_1004;pos_1309;pos_1565;pos_392;pos_4673;pos_502;pos_7650;pos_8714;pos_8773;pos_8793;pos_8996;pos_9160;pos_9189;pos_930;pos_9444;pos_9509;pos_9632;pos_966;pos_9661;pos_993;neg_1033;neg_1100;neg_228;neg_256;neg_572;neg_587;neg_614;neg_729;neg_775;neg_798;neg_837;neg_941;neg_967;neg_980	Gibberellin A7;Gibberellin A53 aldehyde;Geranylgeranyl diphosphate;ent-3beta-Hydroxycassa-12,15-dien-2-one;ent-7alpha-Hydroxykaur-16-en-19-oic acid;Aphidicolin;10-Deacetyl-2-debenzoylbaccatin III;10beta,14beta-Dihydroxytaxa-4(20),11-dien-5alpha-yl acetate;Gibberellin A34-catabolite;Gibberellin A8;Abietinol;Kaur-16-en-18-al;10-Deacetylbaccatin III;2,3-Dehydro-gibberellin A9;Taxa-4(20),11(12)-dien-…	C11867;C11905;C00353;C21826;C11875;C06088;C11899;C20151;C11869;C03579;C11882;C11873;C11700;C11866;C11898;C21831;C06091;C06094;C11864;C11858;C11857;C09183;C07601;C11854;C09189;C11870;C16523;C01699;C16524;C11900;C09163;C11861;C11853;C09094
Metabolism	Metabolism of terpenoids and polyketides	ko00905 Brassinosteroid biosynthesis	11	pos_175;pos_2013;pos_291;pos_7651;pos_8183;pos_9034;pos_9082;pos_9105;pos_9372;pos_9382;pos_9818	6alpha-Hydroxycampestanol;26-Hydroxycastasterone;Brassinolide;(22R,23R)-22,23-Dihydroxycampesterol;Cathasterone;Campesterol;22alpha-Hydroxy-5alpha-campestan-3-one;Campestanol;Castasterone;6-Deoxocastasterone;Teasterone	C15788;C19873;C08814;C16252;C15790;C01789;C15797;C15787;C15794;C15802;C15791
Metabolism	Metabolism of terpenoids and polyketides	ko00906 Carotenoid biosynthesis	48	pos_1565;pos_1568;pos_350;pos_368;pos_385;pos_4375;pos_441;pos_442;pos_4559;pos_4565;pos_4826;pos_485;pos_5365;pos_573;pos_6122;pos_6183;pos_623;pos_6230;pos_628;pos_655;pos_6657;pos_6743;pos_6862;pos_716;pos_755;pos_8016;pos_8433;pos_870;pos_8747;pos_895;pos_9211;pos_9290;pos_9394;pos_9449;pos_9503;pos_957;pos_9674;pos_9682;pos_9712;pos_9770;pos_9811;neg_1081;neg_1093;neg_1124;neg_146;neg_155;ne…	Geranylgeranyl diphosphate;Strigol;Neurosporaxanthin;(3R,2'S)-Myxol 2'-(2,4-di-O-methyl-alpha-L-fucoside);1'-Hydroxy-gamma-carotene glucoside;Demethylspheroidene;Rhodopinal glucoside;Staphyloxanthin;3,4,3',4'-Tetrahydrospirilloxanthin;3',4'-Dihydrorhodovibrin;3'-Hydroxyechinenone;Nostoxanthin;1'-Hydroxy-gamma-carotene;Violaxanthin;(3S,2'S)-4-Ketomyxol 2'-alpha-L-fucoside;Chloroxanthin;(2'S)-Deoxy…	C00353;C09190;C08607;C15937;C15861;C15898;C16271;C16148;C15888;C15887;C15965;C16284;C15859;C08614;C15942;C15892;C15940;C08580;C16282;C16278;C16145;C15895;C15878;C06098;C20692;C15969;C15879;C13453;C15885;C06082;C15967;C19892;C15911;C15902;C16270;C13456;C15881;C16279;C08585;C15968;C15935;C03427;C15914;C06082;C13455;C08579;C15970;C00448
Metabolism	Metabolism of terpenoids and polyketides	ko00908 Zeatin biosynthesis	10	pos_1511;pos_7078;pos_8826;pos_961;neg_1101;neg_222;neg_239;neg_369;neg_910;neg_982	O-beta-D-Xylosylzeatin;UDP-glucose;O-beta-D-Glucosylzeatin;S-Methyl-5'-thioadenosine;Discadenine;5'-Deoxy-5'-(methylthio)adenosine;Adenine;Lupinate;S-Adenosyl-L-methionine;Dihydrozeatin riboside	C03300;C00029;C03423;C00170;C01804;C00170;C00147;C01513;C00019;C16447
Metabolism	Metabolism of terpenoids and polyketides	ko00909 Sesquiterpenoid and triterpenoid biosynthesis	8	pos_2258;pos_2576;pos_481;pos_711;pos_9011;pos_9351;neg_540;neg_856	8-epi-Cedrol;Capsidiol;Achilleol B;Avermitilol;Arabidiol;Camelliol C;Nivalenol;trans,trans-Farnesyl diphosphate	C18245;C09627;C20187;C20181;C19828;C19835;C06080;C00448
Metabolism	Nucleotide metabolism	ko00230 Purine metabolism	14	pos_1000;pos_1421;pos_1499;pos_2340;pos_68;pos_947;pos_967;neg_239;neg_346;neg_41;neg_57;neg_596;neg_72;neg_849	P1,P3-Bis(5'-adenosyl) triphosphate;Deoxyinosine;Urate;2',3'-Cyclic GMP;Aminoimidazole ribotide;(S)-Ureidoglycine;dAMP;Adenine;5'-Phosphoribosylglycinamide;Sulfate;2'-Deoxyinosine 5'-phosphate;1-(5'-Phosphoribosyl)-5-amino-4-(N-succinocarboxamide)-imidazole;cAMP;5'-Butyrylphosphoinosine	C06197;C05512;C00366;C06194;C03373;C02091;C00360;C00147;C03838;C00059;C06196;C04823;C00575;C06435
Metabolism	Nucleotide metabolism	ko00240 Pyrimidine metabolism	8	pos_1367;pos_1494;pos_727;pos_8396;pos_902;pos_99;neg_221;neg_502	5-Hydroxymethyldeoxycytidylate;Deoxycytidine;Barbiturate;2'-Deoxy-5-hydroxymethylcytidine-5'-diphosphate;dUMP;(R)-5,6-Dihydrothymine;Thymidine;Uridine	C03997;C00881;C00813;C11038;C00365;C21028;C00214;C00299

## Sheet: Supplementary materials 3
SK.VS.CK2
Metabolite_ID	Metabolite_name	Pvalue	regulated	KEGG_pathway_annotation	Diff_Metabolites_in_Pathway
pos_1076	(-)-Jasmonoyl-L-isoleucine	0.0439973	down	Plant hormone signal transduction(ko04075)
pos_1094	4-Pyridoxic acid	0.0419104	down	Vitamin B6 metabolism(ko00750)
pos_1124	N-Acetyl-D-glucosamine	0.0112229	down	Amino sugar and nucleotide sugar metabolism(ko00520);;ABC transporters(ko02010)
pos_1472	3-beta-D-Galactosyl-sn-glycerol	0.0444097	down	Glycerolipid metabolism(ko00561);;Galactose metabolism(ko00052)
pos_1681	4-Imidazolone-5-propanoate	0.0429719	down	Histidine metabolism(ko00340)
pos_8781	Lariciresinol	0.0190912	up	Biosynthesis of various plant secondary metabolites(ko00999)
pos_895	(+)-Abscisic acid	0.0473487	down	Plant hormone signal transduction(ko04075);;Carotenoid biosynthesis(ko00906)
pos_928	5-Hydroxy-1-(4-hydroxyphenyl)-3-decanone	0.0269355	down	Stilbenoid, diarylheptanoid and gingerol biosynthesis(ko00945)
pos_9290	4'-Apo-beta,psi-caroten-4'-al	0.0184611	down	Carotenoid biosynthesis(ko00906)
pos_966	Gibberellin A53	0.00621524	down	Diterpenoid biosynthesis(ko00904)
neg_264	Chelirubine	0.0401642	up	Isoquinoline alkaloid biosynthesis(ko00950)
neg_265	4-Amino-4-deoxychorismate	0.0159358	up	Folate biosynthesis(ko00790)
neg_321	5-Hydroxypseudobaptigenin	0.00250742	down	Isoflavonoid biosynthesis(ko00943)
neg_325	D-Glucosaminate-6-phosphate	0.0138397	down	Pentose phosphate pathway(ko00030)
neg_425	Maltotriose	0.0179977	down	ABC transporters(ko02010)
neg_897	Etherolenic acid	0.0445736	up	alpha-Linolenic acid metabolism(ko00592)
neg_908	2',3,4,4',6'-Peptahydroxychalcone 4'-O-glucoside	0.0112254	down	Flavonoid biosynthesis(ko00941)
K.VS.CK2
pos_1053	Protoemetine	0.0061548	up	Isoquinoline alkaloid biosynthesis(ko00950)
pos_1082	Hexahomomethionine	0.034212	up	Glucosinolate biosynthesis(ko00966)
pos_1107	Psilocin	0.0318064	up	Indole alkaloid biosynthesis(ko00901)
pos_1423	1,2-Dehydroreticuline	0.0165867	up	Isoquinoline alkaloid biosynthesis(ko00950)
pos_427	Gentamicin C1	0.000650756	up	Neomycin, kanamycin and gentamicin biosynthesis(ko00524)
pos_454	di-trans,poly-cis-Undecaprenyl diphosphate	0.045712	up	Terpenoid backbone biosynthesis(ko00900)
pos_510	all-trans-Nonaprenyl diphosphate	0.0354875	down	Ubiquinone and other terpenoid-quinone biosynthesis(ko00130);;Terpenoid backbone biosynthesis(ko00900)
pos_68	Aminoimidazole ribotide	0.0110817	down	Thiamine metabolism(ko00730);;Porphyrin metabolism(ko00860);;Purine metabolism(ko00230)
pos_869	Ecgonine	0.0449545	up	Tropane, piperidine and pyridine alkaloid biosynthesis(ko00960)
pos_9157	7-Dehydrocholesterol	0.00517782	up	Steroid biosynthesis(ko00100)
pos_928	5-Hydroxy-1-(4-hydroxyphenyl)-3-decanone	0.0260893	up	Stilbenoid, diarylheptanoid and gingerol biosynthesis(ko00945)
pos_9394	Hydroxychlorobactene	0.00433884	down	Carotenoid biosynthesis(ko00906)
pos_9503	Rhodopinal	0.0199108	down	Carotenoid biosynthesis(ko00906)
pos_9509	ent-2alpha,3alpha-Dihydroxyisokaurene	0.0405508	up	Diterpenoid biosynthesis(ko00904)
pos_980	5-Methoxytryptamine	0.0354316	up	Tryptophan metabolism(ko00380)
neg_1159	Stemmadenine	0.00922212	down	Indole alkaloid biosynthesis(ko00901)
MK.VS.CK2
pos_1204	Formononetin	0.0482838	down	Isoflavonoid biosynthesis(ko00943)
pos_1255	Porphobilinogen	0.00968072	down	Porphyrin metabolism(ko00860)
pos_1343	2-Dehydropantoate	0.0187001	down	Pantothenate and CoA biosynthesis(ko00770)
pos_147	Elwesine	0.0434324	down	Isoquinoline alkaloid biosynthesis(ko00950)
pos_1499	Urate	0.0294393	down	Purine metabolism(ko00230)
pos_1501	HBOA	0.000303627	down	Biosynthesis of various plant secondary metabolites(ko00999);;Benzoxazinoid biosynthesis(ko00402)
pos_1645	Quercetin 3-O-[beta-D-xylosyl-(1->2)-beta-D-glucoside]	0.0124509	down	Flavone and flavonol biosynthesis(ko00944)
pos_1685	CMP-N-acetylneuraminate	0.0248394	down	Amino sugar and nucleotide sugar metabolism(ko00520)
pos_2258	8-epi-Cedrol	0.0487729	down	Sesquiterpenoid and triterpenoid biosynthesis(ko00909)
pos_285	Obtusifoliol	0.0236957	down	Steroid biosynthesis(ko00100)
pos_355	1-Hexadecanol	0.0383817	down	Fatty acid degradation(ko00071)
pos_362	Sphingosine	0.00417007	down	Sphingolipid metabolism(ko00600)
pos_385	1'-Hydroxy-gamma-carotene glucoside	0.0156604	down	Carotenoid biosynthesis(ko00906)
pos_4505	Chlorophyll a	0.0388715	up	Porphyrin metabolism(ko00860)
pos_4565	3',4'-Dihydrorhodovibrin	0.0238311	up	Carotenoid biosynthesis(ko00906)
pos_468	Tetrandrine	0.0259428	down	Isoquinoline alkaloid biosynthesis(ko00950)
pos_481	Achilleol B	0.0193849	down	Sesquiterpenoid and triterpenoid biosynthesis(ko00909)
pos_510	all-trans-Nonaprenyl diphosphate	0.0346604	down	Ubiquinone and other terpenoid-quinone biosynthesis(ko00130);;Terpenoid backbone biosynthesis(ko00900)
pos_5348	OPC4-CoA	0.0251256	up	alpha-Linolenic acid metabolism(ko00592)
pos_5457	Phytosphingosine	0.0317131	down	Sphingolipid metabolism(ko00600)
pos_581	Papaveroxine	0.00317501	down	Isoquinoline alkaloid biosynthesis(ko00950)
pos_586	(13S,14R)-1,13-Dihydroxy-N-methylcanadine	0.000878257	down	Isoquinoline alkaloid biosynthesis(ko00950)
pos_604	Moxifloxacin	0.000951708	down	ABC transporters(ko02010)
pos_6105	Prostaglandin A2	0.0470957	down	Arachidonic acid metabolism(ko00590)
pos_6230	Astaxanthin	0.0439691	down	Carotenoid biosynthesis(ko00906)
pos_6259	Lobeline	0.0225005	down	Tropane, piperidine and pyridine alkaloid biosynthesis(ko00960)
pos_6265	9,10-Dihydroxy-12,13-epoxyoctadecanoic acid	0.0406263	down	Linoleic acid metabolism(ko00591)
pos_6273	Homotrypanothione	0.049558	down	Glutathione metabolism(ko00480)
pos_6286	Dephospho-CoA	0.0413939	down	Pantothenate and CoA biosynthesis(ko00770)
pos_642	C20915	0.014178	down	Monobactam biosynthesis(ko00261)
pos_6637	N1-(5-Phospho-alpha-D-ribosyl)-5,6-dimethylbenzimidazole	0.0302059	down	Porphyrin metabolism(ko00860)
pos_6812	7-Deoxyloganate	0.0319201	down	Monoterpenoid biosynthesis(ko00902)
pos_693	Neomycin B	0.00385821	down	Neomycin, kanamycin and gentamicin biosynthesis(ko00524)
pos_7171	Thromboxane B2	0.0486278	down	Arachidonic acid metabolism(ko00590)
pos_74	5-Aminopentanoate	0.00176016	down	Arginine and proline metabolism(ko00330);;Lysine degradation(ko00310);;D-Amino acid metabolism(ko00470)
pos_741	Phosphonoacetaldehyde	0.00921716	down	Phosphonate and phosphinate metabolism(ko00440)
pos_7428	Oleandomycin	0.0445443	down	ABC transporters(ko02010)
pos_7457	Reduced riboflavin	0.0201585	down	Riboflavin metabolism(ko00740)
pos_755	9-cis-10'-Apo-beta-carotenal	0.0254504	down	Carotenoid biosynthesis(ko00906)
pos_76	D-Glutamic acid	3.01647e-05	down	D-Amino acid metabolism(ko00470)
pos_7614	15(S)-HPETE	0.032693	down	Arachidonic acid metabolism(ko00590)
pos_7630	Riboflavin	0.0180452	down	Riboflavin metabolism(ko00740);;ABC transporters(ko02010)
pos_7693	dTDP-3,4-dioxo-2,6-dideoxy-D-glucose	0.0095806	up	Polyketide sugar unit biosynthesis(ko00523)
pos_8183	Cathasterone	0.0180477	down	Brassinosteroid biosynthesis(ko00905)
pos_831	Thiosulfate	0.00930502	down	ABC transporters(ko02010);;Sulfur metabolism(ko00920)
pos_84	Betaine	0.00613754	down	Glycine, serine and threonine metabolism(ko00260);;ABC transporters(ko02010)
pos_842	N1-Acetyl-tabtoxinine-beta-lactam	0.0417352	down	Monobactam biosynthesis(ko00261)
pos_8615	Phlorizin	0.0261319	up	Flavonoid biosynthesis(ko00941)
pos_8624	Lauroyl-CoA	0.0223166	up	Fatty acid elongation(ko00062);;Fatty acid degradation(ko00071)
pos_8781	Lariciresinol	0.0215547	up	Biosynthesis of various plant secondary metabolites(ko00999)
pos_8880	Sphinganine	0.0299301	down	Sphingolipid metabolism(ko00600)
pos_8895	Icosenoic acid	0.0422657	down	Biosynthesis of unsaturated fatty acids(ko01040)
pos_8898	gamma-Tocopherol	0.0474136	down	Ubiquinone and other terpenoid-quinone biosynthesis(ko00130)
pos_8951	Desacetylvindoline	0.0202851	down	Indole alkaloid biosynthesis(ko00901)
pos_8981	(13Z,16Z)-Docosadienoic acid	0.0285032	down	Biosynthesis of unsaturated fatty acids(ko01040)
pos_9006	22-Hydroxydocosanoate	0.0307102	down	Cutin, suberine and wax biosynthesis(ko00073)
pos_9010	Dodecanoic acid	0.0434168	down	Fatty acid biosynthesis(ko00061)
pos_9011	Arabidiol	0.0372454	down	Sesquiterpenoid and triterpenoid biosynthesis(ko00909)
pos_9018	Antibiotic JI-20B	0.00912256	down	Neomycin, kanamycin and gentamicin biosynthesis(ko00524)
pos_9034	Campesterol	0.040938	down	Steroid biosynthesis(ko00100);;Brassinosteroid biosynthesis(ko00905)
pos_9082	22alpha-Hydroxy-5alpha-campestan-3-one	0.047568	down	Brassinosteroid biosynthesis(ko00905)
pos_9097	Docosanoic acid	0.0295399	down	Cutin, suberine and wax biosynthesis(ko00073);;Biosynthesis of unsaturated fatty acids(ko01040)
pos_9105	Campestanol	0.0240399	down	Brassinosteroid biosynthesis(ko00905)
pos_9133	beta-Alanyl-L-lysine	0.0197225	down	beta-Alanine metabolism(ko00410)
pos_9134	9-Methylthiononanaldoxime	0.0476764	down	Glucosinolate biosynthesis(ko00966)
pos_9187	Cannabigerolate	0.0453758	down	Biosynthesis of various plant secondary metabolites(ko00999)
pos_9189	10-Deacetylbaccatin III	0.0432396	down	Diterpenoid biosynthesis(ko00904)
pos_9201	Coniferin	0.0431415	down	Phenylpropanoid biosynthesis(ko00940)
pos_9209	Ajmaline	0.0448346	down	Indole alkaloid biosynthesis(ko00901)
pos_9273	3-Methyldioxyindole	0.0334699	down	Tryptophan metabolism(ko00380)
pos_928	5-Hydroxy-1-(4-hydroxyphenyl)-3-decanone	0.0226765	up	Stilbenoid, diarylheptanoid and gingerol biosynthesis(ko00945)
pos_9376	4,4-Dimethyl-5alpha-cholesta-8-en-3beta-ol	0.0201157	down	Steroid biosynthesis(ko00100)
pos_938	Xylitol	0.00340083	down	Pentose and glucuronate interconversions(ko00040);;ABC transporters(ko02010)
pos_9381	9,10,18-Trihydroxystearate	0.00133234	down	Cutin, suberine and wax biosynthesis(ko00073)
pos_939	3-Hydroxyisovalerate	0.00330811	down	Valine, leucine and isoleucine degradation(ko00280)
pos_9394	Hydroxychlorobactene	0.0419277	down	Carotenoid biosynthesis(ko00906)
pos_9464	Coumarin	0.0143829	down	Biosynthesis of various plant secondary metabolites(ko00999)
pos_947	(S)-Ureidoglycine	0.0084471	down	Purine metabolism(ko00230)
pos_9503	Rhodopinal	0.00108405	down	Carotenoid biosynthesis(ko00906)
pos_9509	ent-2alpha,3alpha-Dihydroxyisokaurene	0.0442493	down	Diterpenoid biosynthesis(ko00904)
pos_9510	Coproporphyrin I	0.0371232	down	Porphyrin metabolism(ko00860)
pos_9519	16-Feruloyloxypalmitate	0.00702319	down	Cutin, suberine and wax biosynthesis(ko00073)
pos_953	8-Methoxykynurenate	0.0217696	down	Tryptophan metabolism(ko00380)
pos_9554	Calcitriol	0.0144054	down	Steroid biosynthesis(ko00100)
pos_9587	Coniferyl aldehyde	0.00805108	down	Phenylpropanoid biosynthesis(ko00940)
pos_959	4-Hydroxy-L-threonine	0.00736356	down	Vitamin B6 metabolism(ko00750)
pos_961	S-Methyl-5'-thioadenosine	0.025266	down	Cysteine and methionine metabolism(ko00270);;Zeatin biosynthesis(ko00908)
pos_9641	5-Oxo-delta-bilirubin	0.00968807	down	Porphyrin metabolism(ko00860)
pos_9658	2'''-N-Acetyl-6'''-deamino-6'''-hydroxyparomomycin II	0.00203765	down	Neomycin, kanamycin and gentamicin biosynthesis(ko00524)
pos_9660	beta-D-Gentiobiosyl crocetin	0.00498242	down	Biosynthesis of various plant secondary metabolites(ko00999)
pos_9661	Gibberellin A4	0.0179719	down	Diterpenoid biosynthesis(ko00904);;Plant hormone signal transduction(ko04075)
pos_980	5-Methoxytryptamine	0.035202	up	Tryptophan metabolism(ko00380)
pos_9813	4alpha-Carboxy-stigmasta-7,24(24(1))-dien-3beta-ol	0.027887	down	Steroid biosynthesis(ko00100)
pos_9818	Teasterone	0.0330796	down	Brassinosteroid biosynthesis(ko00905)
pos_9855	D-Urobilin	0.0294762	down	Porphyrin metabolism(ko00860)
pos_987	MM 42842	0.0349541	down	Monobactam biosynthesis(ko00261)
neg_1044	9(S)-HOTrE	0.00981069	up	alpha-Linolenic acid metabolism(ko00592)
neg_222	5'-Deoxy-5'-(methylthio)adenosine	0.00542677	down	Cysteine and methionine metabolism(ko00270);;Zeatin biosynthesis(ko00908)
neg_225	4-(beta-D-Glucosyloxy)benzoate	0.0080411	down	Ubiquinone and other terpenoid-quinone biosynthesis(ko00130)
neg_237	DIBOA-glucoside	0.00537652	down	Biosynthesis of various plant secondary metabolites(ko00999);;Benzoxazinoid biosynthesis(ko00402)
neg_505	Betanin	0.0492185	down	Betalain biosynthesis(ko00965)
neg_589	Malvidin 3-O-glucoside	0.0182635	down	Anthocyanin biosynthesis(ko00942)
neg_897	Etherolenic acid	0.0457181	up	alpha-Linolenic acid metabolism(ko00592)
pos_147	Elwesine	0.035026	up	Isoquinoline alkaloid biosynthesis(ko00950)
pos_1494	Deoxycytidine	0.047232	down	Pyrimidine metabolism(ko00240);;ABC transporters(ko02010)
pos_245	6'-Dehydro-6'-oxoparomamine	0.0201382	up	Neomycin, kanamycin and gentamicin biosynthesis(ko00524)
pos_2744	1-(4-Hydroxyphenyl)-1-decene-3,5-dione	0.0272744	down	Stilbenoid, diarylheptanoid and gingerol biosynthesis(ko00945)
pos_392	ent-3beta-Hydroxycassa-12,15-dien-2-one	0.0176767	down	Diterpenoid biosynthesis(ko00904)
pos_427	Gentamicin C1	0.00114637	up	Neomycin, kanamycin and gentamicin biosynthesis(ko00524)
pos_510	all-trans-Nonaprenyl diphosphate	0.0256208	down	Ubiquinone and other terpenoid-quinone biosynthesis(ko00130);;Terpenoid backbone biosynthesis(ko00900)
pos_527	12,13-DHOME	0.034952	down	Linoleic acid metabolism(ko00591)
pos_9086	9(10)-EpOME	0.0237092	down	Linoleic acid metabolism(ko00591)
pos_9157	7-Dehydrocholesterol	0.00408137	up	Steroid biosynthesis(ko00100)
pos_9503	Rhodopinal	0.0407649	down	Carotenoid biosynthesis(ko00906)
pos_9632	Aconitine	0.0483117	up	Diterpenoid biosynthesis(ko00904)
pos_9847	Pheophorbide a	0.013534	up	Porphyrin metabolism(ko00860)
S.VS.CK2
pos_100	D-Mannitol 1-phosphate	0.0297716	Fructose and mannose metabolism(ko00051)
pos_1053	Protoemetine	0.0269863	Isoquinoline alkaloid biosynthesis(ko00950)
pos_1348	Thiamine aldehyde	0.0499259	Thiamine metabolism(ko00730)
pos_1414	Cyclic dehypoxanthine futalosine	0.0392179	Ubiquinone and other terpenoid-quinone biosynthesis(ko00130)
pos_1423	1,2-Dehydroreticuline	0.0184796	Isoquinoline alkaloid biosynthesis(ko00950)
pos_145	(-)-Epicatechin	0.0393587	Flavonoid biosynthesis(ko00941)
pos_147	Elwesine	0.035026	Isoquinoline alkaloid biosynthesis(ko00950)
pos_1494	Deoxycytidine	0.047232	Pyrimidine metabolism(ko00240);;ABC transporters(ko02010)
pos_245	6'-Dehydro-6'-oxoparomamine	0.0201382	Neomycin, kanamycin and gentamicin biosynthesis(ko00524)
pos_2744	1-(4-Hydroxyphenyl)-1-decene-3,5-dione	0.0272744	Stilbenoid, diarylheptanoid and gingerol biosynthesis(ko00945)
pos_392	ent-3beta-Hydroxycassa-12,15-dien-2-one	0.0176767	Diterpenoid biosynthesis(ko00904)
pos_427	Gentamicin C1	0.00114637	Neomycin, kanamycin and gentamicin biosynthesis(ko00524)
pos_510	all-trans-Nonaprenyl diphosphate	0.0256208	Ubiquinone and other terpenoid-quinone biosynthesis(ko00130);;Terpenoid backbone biosynthesis(ko00900)
pos_527	12,13-DHOME	0.034952	Linoleic acid metabolism(ko00591)
pos_9086	9(10)-EpOME	0.0237092	Linoleic acid metabolism(ko00591)
pos_9157	7-Dehydrocholesterol	0.00408137	Steroid biosynthesis(ko00100)
pos_9503	Rhodopinal	0.0407649	Carotenoid biosynthesis(ko00906)
pos_9632	Aconitine	0.0483117	Diterpenoid biosynthesis(ko00904)
pos_9847	Pheophorbide a	0.013534	Porphyrin metabolism(ko00860)
neg_236	N-Acetylthienamycin	0.00751311	down	Carbapenem biosynthesis(ko00332)
neg_321	5-Hydroxypseudobaptigenin	0.0127511	down	Isoflavonoid biosynthesis(ko00943)
neg_325	D-Glucosaminate-6-phosphate	0.0190493	down	Pentose phosphate pathway(ko00030)
neg_591	Apigenin 7-O-[beta-D-apiosyl-(1->2)-beta-D-glucoside]	0.0251872	down	Flavone and flavonol biosynthesis(ko00944)
neg_848	(-)-Maackiain	0.0499002	up	Isoflavonoid biosynthesis(ko00943)
neg_856	trans,trans-Farnesyl diphosphate	0.0214088	up	Terpenoid backbone biosynthesis(ko00900);;Steroid biosynthesis(ko00100);;Sesquiterpenoid and triterpenoid biosynthesis(ko00909);;Carotenoid biosynthesis(ko00906);;Biosynthesis of various plant secondary metabolites(ko00999)
