# Supplementary figures and images for: Physiological and Metabolomic Analyses of Exogenously Applied Sorbitol-Chelated Potassium Enhancing Drought Tolerance in Wheat
Source: Research Square preprint supplement (doi:10.21203/rs.3.rs-7498264/v1), 2025-09-12

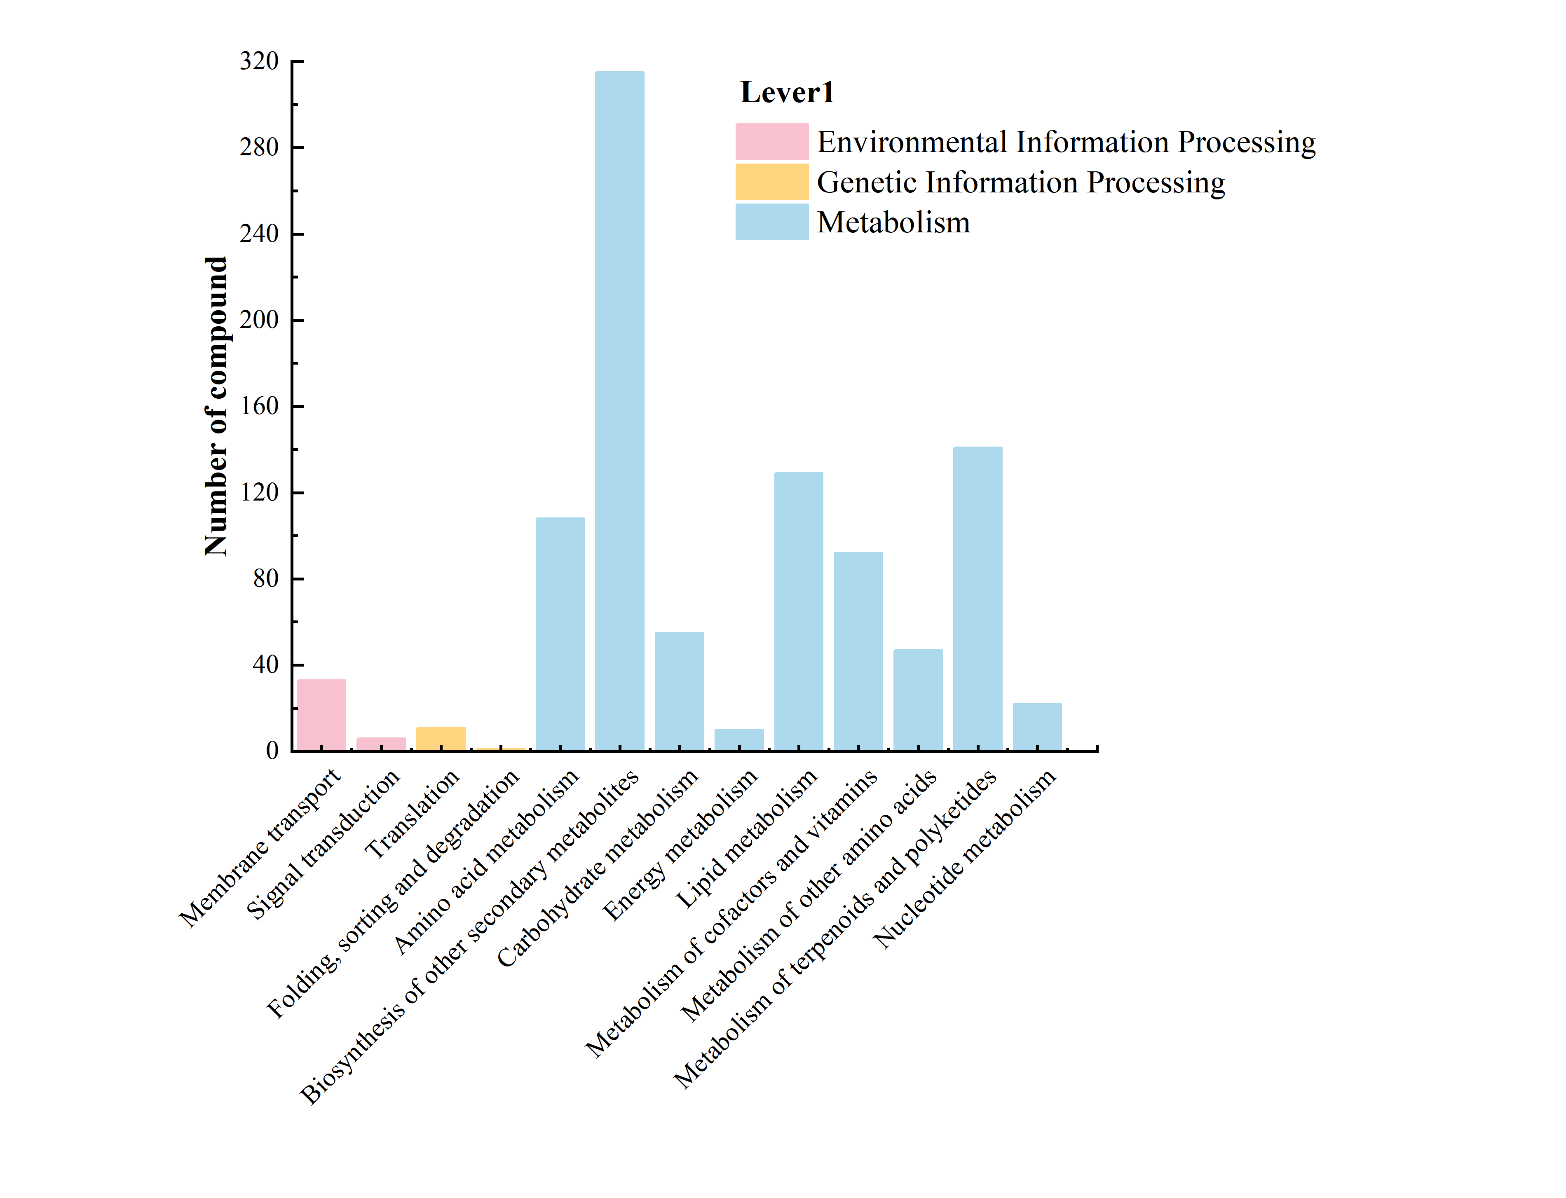
 Fig. S1 Classification of KEGG annotations for differential metabolites

Supplement: Supplementary file 2 [file 5c1e8a5c2714f35b72a9b391.docx]
